# Supplementary material for: A New Double Stranded RNA Suppresses Bladder Cancer Development by Upregulating p21Waf1/CIP1 Expression
Source: PubMed Central journal article supplement (PMC4396018; doi:10.1155/2015/304753), 2015-03-30

## Supplementary Tables

**Supplementary Table S1. Sequences for double-stranded RNAs used in present study.**

|                     | Sequences (5'-3')           |
|---------------------|-----------------------------|
| dsP21-397 Sense     | UUGCCUGCCAGAGUGGGUC[dT][dT] |
| dsP21-397 Antisense | GACCCACUCUGGCAGGCAA[dT][dT] |
| dsControl Sense     | ACUACUGAGUGACAGUAGA[dT][dT] |
| dsControl Antisense | UCUACUGUCACUCAGUAGU[dT][dT] |
| siP21 Sense         | CUUCGACUUUGUCACCGAG[dT][dT] |
| siP21 Antisense     | CUCGGUGACAAAGUCGAAG[dT][dT] |

**Supplementary Table S2. Primers used for real-time PCR.**

|                 | Sequences (5'-3')     |
|-----------------|-----------------------|
| p21 (forward)   | GCCCAGTGGACAGCGAGCAG  |
| p21 (reverse)   | GCCGGCGTTTGGAGTGGTAGA |
| GAPDH (forward) | TCCCATCACCATCTTCCA    |
| GAPDH (reverse) | CATCACGCCACAGTTTCC    |

GAPDH = glyceraldehyde-3-phosphate dehydrogenase.

## Supplementary Figure legends

**Figure S1. The p21-activated activities of dsP21-397 or miR-1180-5p in BC cells.** Cells were transfected with dsP21-397 or miR-1180-5p at the indicated concentrations. (A) and (B) Expression of p21 mRNA was evaluated by real-time PCR and normalized to dsP21-397 group at the indicated concentrations. GAPDH served as a loading control.

**Figure S1**

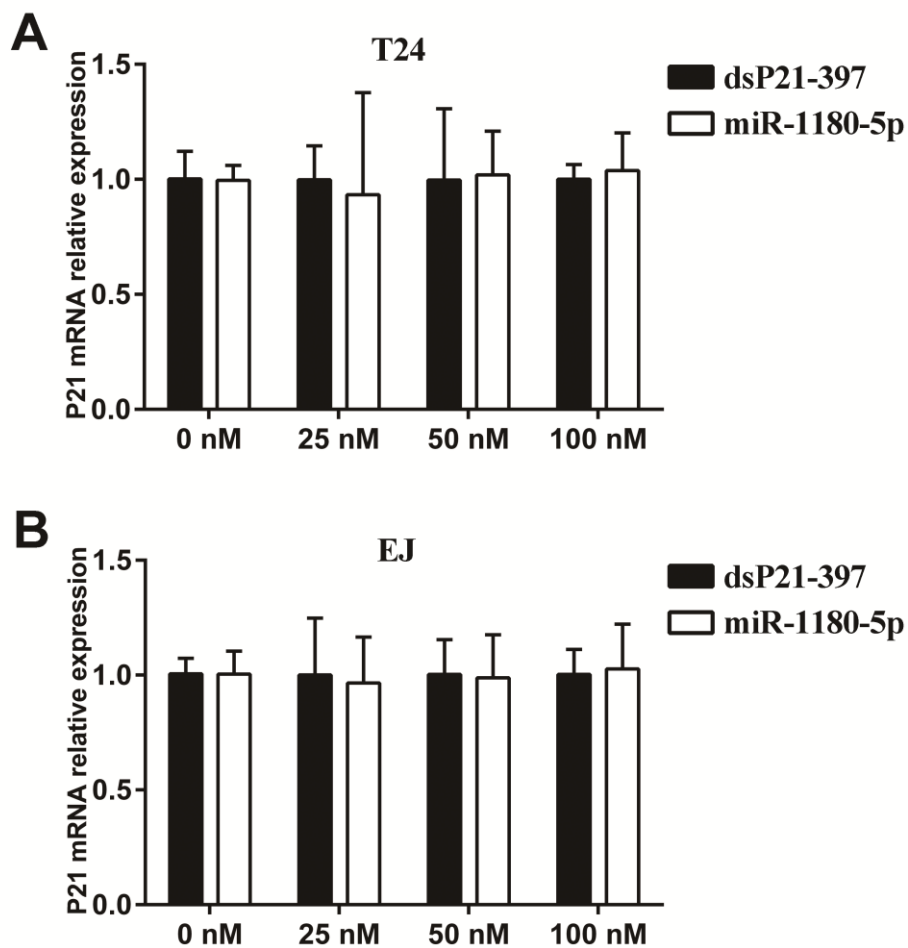

Supplement: 304753.f1.pdf [file 304753.f1.pdf]
